# Supplementary material for: Spatio-Temporal Analysis of Heating and Cooling Degree-Days Over Iran
Source: Research Square preprint supplement (doi:10.21203/rs.3.rs-441421/v1), 2021-04-26
Supplement: Supplementary file 1 [file 851d8b9230353958c241d083.docx]

# Appendix

Table A. 1. Performance measurs for IDW, Kriging and CoKriging interpolation methods.

| **Variable** | **Error metric** | **IDW** | **kriging** | **Cokriging** |
| --- | --- | --- | --- | --- |
| HDD | NRMSE (%) | 19.6 | 17.5 | 4.7 |
| MAPE (%) | 109.3 | 93.1 | 21.0 |
| MBE (ºC-day) | 36.3 | 18.0 | 3.1 |
|  |  |  |  |  |
| CDD | NRMSE (%) | 20.2 | 19.0 | 6.6 |
| MAPE (%) | 53.8 | 52.4 | 23.8 |
| MBE (ºC-day) | -52.8 | -51.8 | 10.5 |
|  |  |  |  |  |
| HDD+CDD | NRMSE (%) | 23.7 | 22.8 | 17.3 |
| MAPE (%) | 11.2 | 10.7 | 8.0 |
| MBE (ºC-day) | -22.5 | -18.8 | 3.6 |
